# Supplementary material
Source: Hindawi journal article supplement (doi:10.1155/2011/915240)
Supplement: f1 [file 915240.f1.pdf]

Supplementary Table 1

Hematological parameters of animals dosed with CA extracts.

| Hematological parameters                 | Control<br>(0.5 % NaCMC) | <i>C. auriculata</i> (mg kg <sup>-1</sup> ) |               |               |               |               |
|------------------------------------------|--------------------------|---------------------------------------------|---------------|---------------|---------------|---------------|
|                                          |                          | HA                                          |               | SFE           |               |               |
|                                          |                          | 500                                         | 1000          | 250           | 500           | 1000          |
| <b>Male</b>                              |                          |                                             |               |               |               |               |
| WBC (X10 <sup>3</sup> µL <sup>-1</sup> ) | 11.8 ± 3.0               | 10.5 ± 3.9                                  | 7.1 ± 2.4     | 12.3 ± 3.2    | 7.2 ± 0.5     | 15.9 ± 2.5    |
| RBC (X10 <sup>6</sup> µL <sup>-1</sup> ) | 8.7 ± 1.2                | 8.07 ± 1.0                                  | 7.7 ± 0.9     | 7.4 ± 1.0     | 7.1 ± 0.6     | 7.9 ± 0.2     |
| HB (g dL <sup>-1</sup> )                 | 16.3 ± 1.3               | 15.7 ± 1.3                                  | 14.80 ± 1.1   | 14.0 ± 1.0    | 12.7 ± 1.6    | 14.4 ± 0.6    |
| HCT (%)                                  | 50.9 ± 6.3               | 48.7 ± 5.6                                  | 46.3 ± 4.2    | 44.3 ± 4.2    | 40.4 ± 4.4    | 45.3 ± 1.6    |
| MCV (fL)                                 | 58.6 ± 2.2               | 60.5 ± 1.1                                  | 59.0 ± 1.3    | 60.7 ± 2.7    | 57.1 ± 1.9    | 57.7 ± 2.4    |
| MCH (pg)                                 | 18.9 ± 1.4               | 18.8 ± 0.8                                  | 17.9 ± 0.6    | 19.4 ± 0.9    | 17.9 ± 1.3    | 18.3 ± 1.0    |
| MCHC (g dL <sup>-1</sup> )               | 32.2 ± 1.5               | 32.3 ± 1.1                                  | 32.0 ± 0.59   | 31.5 ± 0.7    | 31.4 ± 1.3    | 31.7 ± 0.8    |
| PLT (X10 <sup>3</sup> µL <sup>-1</sup> ) | 656.8 ± 191.4            | 662.8 ± 142.2                               | 673 ± 142.6   | 678.3 ± 233.9 | 671.2 ± 266.1 | 701.2 ± 196.3 |
| <b>Female</b>                            |                          |                                             |               |               |               |               |
| WBC (X10 <sup>3</sup> µL <sup>-1</sup> ) | 7.8 ± 3.2                | 6.6 ± 1.1                                   | 6.7 ± 1.7     | 7.2 ± 3.0     | 8.0 ± 2.9     | 8.5 ± 3.0     |
| RBC (X10 <sup>6</sup> µL <sup>-1</sup> ) | 7.6 ± 1.4                | 7.8 ± 0.8                                   | 8.2 ± 0.3     | 8.29 ± 0.8    | 8.07 ± 1.0    | 8.8 ± 1.4     |
| HB (g dL <sup>-1</sup> )                 | 15.6 ± 1.3               | 14.8 ± 1.1                                  | 14.6 ± 1.1    | 15.15 ± 1.80  | 14.1 ± 0.4    | 13.5 ± 1.6    |
| HCT (%)                                  | 48.7 ± 5.08              | 46.3 ± 4.2                                  | 45.8 ± 3.3    | 48.0 ± 6.3    | 49.1 ± 8.1    | 46.2 ± 4.0    |
| MCV (fL)                                 | 60.4 ± 1.0               | 59.0 ± 1.3                                  | 56.18 ± 1.7   | 57.8 ± 2.3    | 60.6 ± 5.7    | 62.4 ± 6.6    |
| MCH (pg)                                 | 19.5 ± 0.9               | 18.90 ± 0.8                                 | 17.9 ± 0.7    | 18.2 ± 0.5    | 20.3 ± 1.0    | 19.9 ± 0.8    |
| MCHC (g dL <sup>-1</sup> )               | 32.3 ± 1.0               | 31.9 ± 0.6                                  | 32.0 ± 0.3    | 31.6 ± 0.5    | 34.1 ± 1.1    | 34.0 ± 0.8    |
| PLT (X10 <sup>3</sup> µL <sup>-1</sup> ) | 600.8 ± 150.0            | 562.8 ± 130.2                               | 620.4 ± 129.6 | 550.2 ± 166.1 | 612.2 ± 106.4 | 652.2 ± 95.9  |

Data are expressed as mean ± S.D., n = 6, No statistical difference between the control and CA extracts treated rats.

Supplementary Table 2

Differential white blood count of animals dosed with CA extracts.

| Differential count<br>(%) | Control<br>(0.5 % NaCMC) | <i>C. auriculata</i> (mg kg <sup>-1</sup> ) |             |             |             |             |
|---------------------------|--------------------------|---------------------------------------------|-------------|-------------|-------------|-------------|
|                           |                          | HA                                          |             | SFE         |             |             |
|                           |                          | 500                                         | 1000        | 250         | 500         | 1000        |
| Male                      |                          |                                             |             |             |             |             |
| Neutrophil                | 29.2 ± 5.3               | 28.4 ± 11.1                                 | 30.2 ± 9.5  | 31.2 ± 7.4  | 31.6 ± 6.3  | 32.3 ± 5.1  |
| Eosinophil                | 5.4 ± 1.0                | 3.2 ± 2.1                                   | 2.3 ± 1.3   | 5.7 ± 0.6   | 5.0 ± 0.9   | 5.5 ± 1.1   |
| Lymphocyte                | 75.8 ± 12.1              | 72.0 ± 9.1                                  | 61.4 ± 13.5 | 83.5 ± 11.3 | 63.7 ± 10.3 | 84.3 ± 11.1 |
| Monocyte                  | 3.9 ± 1.3                | 4.7 ± 2.1                                   | 3.9 ± 1.5   | 4.0 ± 1.5   | 2.1 ± 1.1   | 4.9 ± 0.7   |
| Female                    |                          |                                             |             |             |             |             |
| Neutrophil                | 28.1 ± 7.2               | 31.2 ± 7.4                                  | 26.4 ± 10.1 | 32.9 ± 12.4 | 35.5 ± 14.1 | 28.1 ± 11.1 |
| Eosinophil                | 4.3 ± 1.1                | 2.1 ± 1.1                                   | 2.7 ± 2.1   | 3.1 ± 2.1   | 5.6 ± 1.1   | 5.0 ± 0.8   |
| Lymphocyte                | 63.4 ± 10.1              | 80.1 ± 15.3                                 | 73.2 ± 21.2 | 75.3 ± 22.5 | 65.1 ± 15.2 | 60.2 ± 21.1 |
| Monocyte                  | 4.0 ± 1.1                | 3.4 ± 2.1                                   | 3.4 ± 1.1   | 2.5 ± 0.9   | 4.6 ± 1.7   | 2.5 ± 1.8   |

Data are expressed as mean ± S.D., n = 6, No statistical difference between the control and CA extracts treated rats.

Supplementary Table 3: Serum biochemistry values of animals treated with different extracts of CA

| Serum biochemistry                         | Control<br>(0.5 % NaCMC) | <i>C. auriculata</i> (mg kg <sup>-1</sup> ) |               |                |               |               |
|--------------------------------------------|--------------------------|---------------------------------------------|---------------|----------------|---------------|---------------|
|                                            |                          | HA                                          |               |                | SFE           |               |
|                                            |                          | 500                                         | 1000          | 250            | 500           | 1000          |
| Male                                       |                          |                                             |               |                |               |               |
| Fasting Glucose (mg dL <sup>-1</sup> )     | 107.0 ± 10.4             | 124.7 ± 16.2                                | 119.4 ± 11.7  | 104.0 ± 26.2   | 118.3 ± 20.7  | 117.9 ± 14.2  |
| Cholesterol (mg dL <sup>-1</sup> )         | 61.2 ± 11.7              | 53.2 ± 8.4                                  | 58.1 ± 18.6   | 54.4 ± 11.4    | 89.0 ± 28.8   | 60.0 ± 12.3   |
| Triglyceride (mg dL <sup>-1</sup> )        | 83.0 ± 25.1              | 74.0 ± 18.2                                 | 98.2 ± 10.1   | 87.6 ± 26.4    | 83.0 ± 32.3   | 85.0 ± 5.8    |
| ALT (IU L <sup>-1</sup> )                  | 64.6 ± 15.6              | 55.5 ± 15.1                                 | 56.4 ± 6.4    | 71.0 ± 14.9    | 63.0 ± 16.8   | 95.0 ± 22.7** |
| AST (IU L <sup>-1</sup> )                  | 199.0 ± 28.3             | 181.0 ± 22.4                                | 167.0 ± 13.1  | 186.0 ± 30.6   | 183.0 ± 32.4  | 185.0 ± 13.1  |
| Total Bilirubin (mg dL <sup>-1</sup> )     | 0.34 ± 0.06              | 0.41 ± 0.05                                 | 0.40 ± 0.01   | 0.33 ± 0.06    | 0.44 ± 0.07   | 0.5 ± 0.1     |
| ALP (IU L <sup>-1</sup> )                  | 514.0 ± 90.0             | 505.0 ± 84.4                                | 555.0 ± 97.1  | 491.0 ± 93.6   | 505.0 ± 94.7  | 579.0 ± 74.5* |
| Blood Urea Nitrogen (mg dL <sup>-1</sup> ) | 55.0 ± 4.2               | 53.0 ± 2.2                                  | 44.0 ± 10.1   | 50.0 ± 3.4     | 39.0 ± 10.6   | 44 ± 3.2      |
| Creatinine (mg dL <sup>-1</sup> )          | 0.51 ± 0.05              | 0.55 ± 0.02                                 | 0.44 ± 0.03   | 0.49 ± 0.09    | 0.7 ± 0.2     | 0.4 ± 0.03    |
| Total Proteins (mg dL <sup>-1</sup> )      | 8.3 ± 0.4                | 7.8 ± 1.0                                   | 8.0 ± 0.8     | 7.7 ± 0.75     | 7.6 ± 1.0     | 7.3 ± 0.6     |
| Albumin (mg dL <sup>-1</sup> )             | 3.8 ± 0.1                | 3.0 ± 0.2                                   | 3.7 ± 0.3     | 3.4 ± 0.22     | 3.9 ± 0.6     | 3.4 ± 0.6     |
| Globulin (mg dL <sup>-1</sup> )            | 4.5 ± 0.5                | 4.9 ± 0.7                                   | 4.1 ± 0.4     | 4.3 ± 0.65     | 3.6 ± 1.1     | 3.9 ± 0.4     |
| Female                                     |                          |                                             |               |                |               |               |
| Fasting Glucose (mg dL <sup>-1</sup> )     | 124.5 ± 17.6             | 118.3 ± 20.1                                | 117.3 ± 10.9  | 155.0 ± 33.5   | 89.2 ± 12.2   | 122.1 ± 22.5  |
| Cholesterol (mg dL <sup>-1</sup> )         | 53.2 ± 8.4               | 58.1 ± 18.6                                 | 51.9 ± 11.3   | 47.9 ± 19.1    | 61.2 ± 14.1   | 59.2 ± 21.5   |
| Triglyceride (mg dL <sup>-1</sup> )        | 90.1 ± 21.9              | 104.6 ± 28.3                                | 110.8 ± 29.8  | 71.5 ± 45.4    | 75.2 ± 22.4   | 84.4 ± 26.2   |
| ALT (IU L <sup>-1</sup> )                  | 55.5 ± 15.1              | 52.3 ± 16.4                                 | 53.4 ± 14.4   | 34.9 ± 21.4    | 60.5 ± 23.4   | 56.4 ± 14.1   |
| AST (IU L <sup>-1</sup> )                  | 177.9 ± 29.0             | 161.1 ± 31.5                                | 156.4 ± 40.8  | 117.3 ± 46.7** | 169.8 ± 36.5  | 170.4 ± 44.1  |
| Total Bilirubin (mg dL <sup>-1</sup> )     | 0.39 ± 0.1               | 0.27 ± 0.09                                 | 0.33 ± 0.08   | 0.36 ± 0.04    | 0.4 ± 0.1     | 0.43 ± 0.06   |
| ALP (IU L <sup>-1</sup> )                  | 523.2 ± 106.4            | 558.5 ± 102.3                               | 498.5 ± 112.7 | 470.8 ± 102.1  | 470.5 ± 101.5 | 541.0 ± 51.9  |
| Blood Urea Nitrogen (mg dL <sup>-1</sup> ) | 51.0 ± 1.4               | 55.1 ± 16.1                                 | 39 ± 5.7      | 35.7 ± 12.7    | 45.4 ± 10.5   | 48.5 ± 11.5   |
| Creatinine (mg dL <sup>-1</sup> )          | 0.6 ± 0.0                | 0.55 ± 0.04                                 | 0.53 ± 0.09   | 0.5 ± 0.09     | 0.7 ± 0.05    | 0.6 ± 0.07    |
| Total Proteins (mg dL <sup>-1</sup> )      | 8.1 ± 0.5                | 7.9 ± 0.9                                   | 7.8 ± 0.8     | 7.4 ± 2.8      | 7.7 ± 1.5     | 8.2 ± 1.2     |
| Albumin (mg dL <sup>-1</sup> )             | 3.6 ± 0.2                | 3.5 ± 0.3                                   | 3.6 ± 0.2     | 3.1 ± 1.3      | 3.5 ± 1.1     | 3.6 ± 0.8     |
| Globulin (mg dL <sup>-1</sup> )            | 4.5 ± 0.5                | 4.4 ± 0.7                                   | 4.1 ± 0.61    | 4.2 ± 1.6      | 4.0 ± 1.5     | 4.2 ± 0.8     |

Data are expressed as mean ± S.D., n = 6, statistical difference between the control and CA extract treated rats denoted by \*P < 0.05, \*\* P < 0.01.
