# Supplementary material
Source: Hindawi journal article supplement (doi:10.1155/2011/915240)
Supplement: f2 [file 915240.f2.pdf]

Supplementary Figure 1. Standardization of hydroalcoholic extract of *Cassia auriculata* seeds for procyanidin B1, epicatechin and catechin

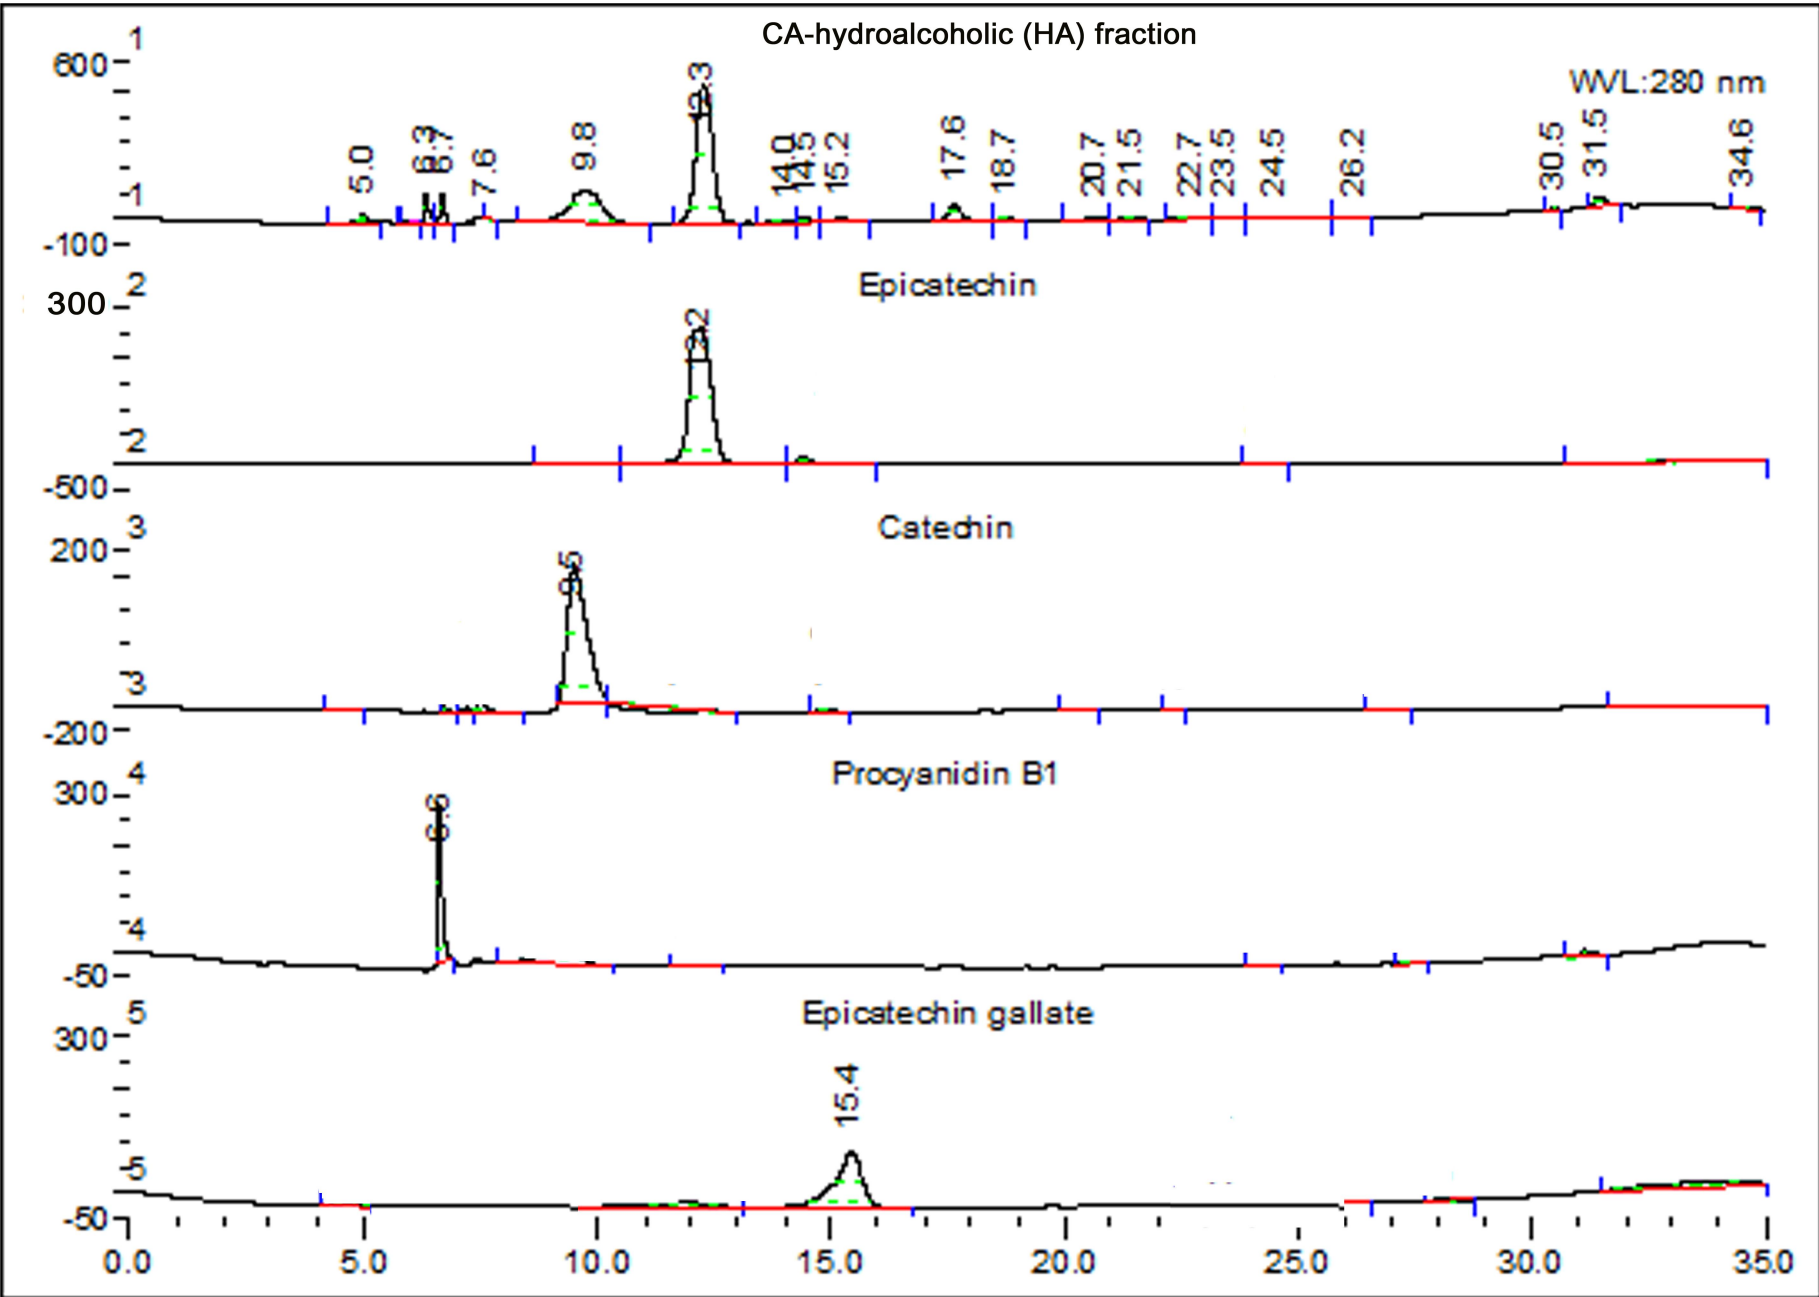

Mobile phase A – water: methanol: formic acid (79.5:20:0.5) and B- acetonitrile: formic acid (99.7:0.3) at a flow rate of 0.4 mL. Gradient was as follows: 0 to 15 min – B (5%); 15 to 20 min – B (5 to 20%); 20 to 25 min – B (20 to 30%); 25 to 30 min –B (30 to 50%); 30 to 35 min – re-equilibration B (50 to 5%)

Relative retention at 280 nm and the spectra match demonstrates presence of epicatechin (14%); catechin (4.5%) and procyanidin (1%) in hydroalcoholic fraction of *Cassia auriculata* seeds
